# Supplementary material
Source: MDPI journal article supplement (https://www.mdpi.com/2071-1050/15/3/1849)
Supplement: s1 [file s1]

## **SURVEY 1 - CALL TO BUSINESS LEADERS AND/OR CEO**

*Construction accounts for approximately 40% of energy consumption, 40% of material consumption, 30% of waste and 5% of the gross domestic product in Denmark and similar countries. Architectural firms have extraordinary potential in the transition to sustainable construction industry. Architects' consultancy and innovation in processes, materials, and solutions can significantly affect environmental, economic, and social sustainability. This is the background for this member survey, which will help us all understand the architectural industry's sustainability work and lead to targeted efforts for the necessary competence and business development for Danish Architectural Firms. Initially, we ask you for general information about your company and a little future thinking.*

### **GENERALLY**

*3.1.1. Identification and company size, subject areas, readiness for future strict sustainability requirements in the Danish building regulations, and expectations for future demands.*

**1. VQ1 - Please provide the data below.**

Name / Company / Address / Zip code / City / Web / Email address / Phone number

**2. VQ2 - How many employees are there in the company? (including owner/owners)**

Sole proprietorship / 2-4 employees / 5-9 employees / 10-19 employees / 20-39 employees / 40+ employees

**3. VQ3 - The company's subject areas. Check as many boxes as are relevant.**

- Affordable housing, new construction
- Affordable housing, transformation / renovation
- Private housing construction, new construction
- Private residential construction, transformation / renovation
- Transformation / renovation, categories other than residential construction
- Office building
- Information, school and institution building
- Sports and cultural facilities
- Restoration
- Urban planning
- Urban spaces
- Area development
- Landscape planning
- Climate adaptation
- Biodiversity and nature conservation
- Site preparation for development
- Client advice
- Strategic advice
- Process planning
- Other areas not mentioned

4. **VQ4 - How well prepared is the company for the voluntary sustainability class to become mandatory in 2023? Check one box.**
- Not ready
  - Knows the content, is about to run in position
  - Is in the process of implementing
  - Have what it takes is 100% ready
5. **VQ5 - How much of the company's revenue will be linked to sustainability in five years? Check one box.**
- 0-25% / 25-50% / 50-75% / 75-100%

## **SUSTAINABILITY**

*3.1.2. Daily practice for sustainable performance and sustainable deliveries – how what, how often, the extent of demand here and now, nature of single services in the field of sustainability.*

6. **VQ6 - How do you work with sustainability in the company? Check one box.**
- Sustainable operation of the company (internally)?
  - Sustainability in the company's deliveries (externally)?
  - Both?
  - The company does not work with sustainability
  - Other (please specify)
7. **VQ7 - What do sustainable operations in the company include for you? Check as many boxes as you want.**
- Green accounts for day-to-day operations.
  - Continuing education with a focus on sustainability.
  - Formalized knowledge sharing about sustainability.
  - Green purchases for the company.
  - Sustainability as a focus of business development.
  - No focus.
  - Other (please specify)
8. **VQ8 - What is sustainability in the company's deliveries? Check one box.**
- We see sustainability as an additional delivery
  - We see sustainability as a core delivery
  - Sustainability is integrated into all our deliveries.
9. **VQ9 - How often is sustainability practised in the company's deliveries? Check one box.**
- Never
  - The company practices sustainability when the customer demands it.
  - The company practices more sustainability than the customer demands
  - The company always practices sustainability, regardless of whether the customer demands it.
  - Other (please specify)

## **SUPPLY AND DEMANDS, SKILLS**

### *3.1.3. Expectations of skills development and sustainability needs.*

**10. VQ10 - To what extent do you experience demand for sustainable construction from your clients / customers? Check one box.**

- They never demand sustainability.
- They demand stand-alone sustainable solutions in construction
- They require buildings that can be sustainability certified
- They are frontrunners and risk-averse in their expectations and expect more than sustainability-certified construction
- Other (please specify)

**11. VQ11 - What do the company's sustainability deliveries consist of, and at what level are they practised?**

- The company does not deliver or rarely (0-25%)
- The company occasionally delivers (25-50%)
- The company often delivers (50- 75%)
- The company delivers almost always (75-100%)

Respectively:

- Energy optimization?
- Sustainability certification?
- Material knowledge? (e.g. biomaterials, etc.)
- Circular economy?
- Life Cycle Assessments (LCA)?
- Life cycle costing / total economy (LCC)?
- Social value creation / social sustainability?
- Healing architecture?
- Universal design?
- Post Occupancy Evaluation?
- Accessibility?
- Other (please specify)

**12. VQ12 - If you are to develop further the company's competencies concerning where you stand today, where would you like to go within the next 2-4 years?**

- We're already home safe today!
- We want to become 35% more at home!
- We want to become 65% more at home!
- We want to become 100% at home safe!

Respectively:

- Energy optimization
- Sustainability certification
- Material knowledge? (e.g. biomaterials, etc.)
- Circular economy
- Life Cycle Assessments (LCA)
- Life cycle costing / total economy (LCC)

- Social value creation / social sustainability
- Healing architecture
- Universal design
- Post Occupancy Evaluation
- Accessibility
- Other (please specify)

**13. VQ13 - At Danish Architectural Firms, we are in the process of planning programs for competence development that will help you achieve your goals. Therefore, we would like to hear more about what the company needs in knowledge and input. Check as many boxes as you think are relevant.**

- Change management
- Strategy development
- Sustainability management
- Communication skills
- Competences for evaluation and follow-up
- Continuing education in the circular economy
- Continuing education in LCA
- Continuing education in LCC
- Continuing education in social value creation
- Process planning
- Pricing sustainability deliverables
- Other: Please indicate wishes:

## **ABOUT YOU**

*3.1.4. The respondent's role, education, background and particular competencies in sustainability.*

**14. VQ14 - What function do you hold in the company? Mark max six positions.**

- Founder
- Partner
- Managing director
- Senior executive
- Finance Manager
- HR/administrationsansvarlig
- Project manager
- Project manager
- Head of sustainability
- Communications Officer
- Competition/Procurement Officer
- Other

**15. VQ15 - Are you the sustainability officer in the company?**

Yes

No - Then who is the sustainability officer?

**16. VQ16 - What are your areas of study? Feel free to check more boxes.**

- Urban planning / urban development
- Landscape/Area Development
- Design

- Sketching / concept development / competitions Client consultancy
- Housing (affordable)
- Homes (private)
- Corporate governance
- Project management
- Design management
- Building site management
- Economy
- Contracts
- Working environment
- Sustainability management
- Consultant or auditor, sustainability certification
- IT
- User involvement
- Areas not mentioned

**17. VQ17 - Have you taken additional training in sustainability? Feel free to check more boxes.**

- Sustainability management
- DGNB consultant / auditor
- LCA
- LCC
- No, no formal continuing education
- Other (which is not mentioned)

**18. VQ18 - How will you assess your knowledge and insight about sustainability on a scale of 1-4, where 1 = limited knowledge and 4 = excellent knowledge.**

- Limited knowledge
- Some knowledge
- Good knowledge
- Excellent knowledge

Respectively:

- LCA
- LCC
- Health, welfare
- Universal design
- Healing architecture
- Indoor climate and comfort
- Working environment
- Availability
- Recycling, recycling
- Energy optimization
- Urban spaces
- Climate adaptation
- Planning
- Sustainability management and certification
